# Supplementary material
Source: ML conference proceedings conference paper supplement (https://openreview.net/forum?id=Ji1_32XWMxK)
Supplement: supplementary_material [file attachment]

[illegible]

[illegible]

[illegible]

[illegible]
